# Supplementary material
Source: Springer Nature journal article supplement (https://www.springermedizin.de/resource/supplementary/13046_2011_471_MOESM9_ESM.pdf/9662298)

10<sup>6</sup> copy numbers

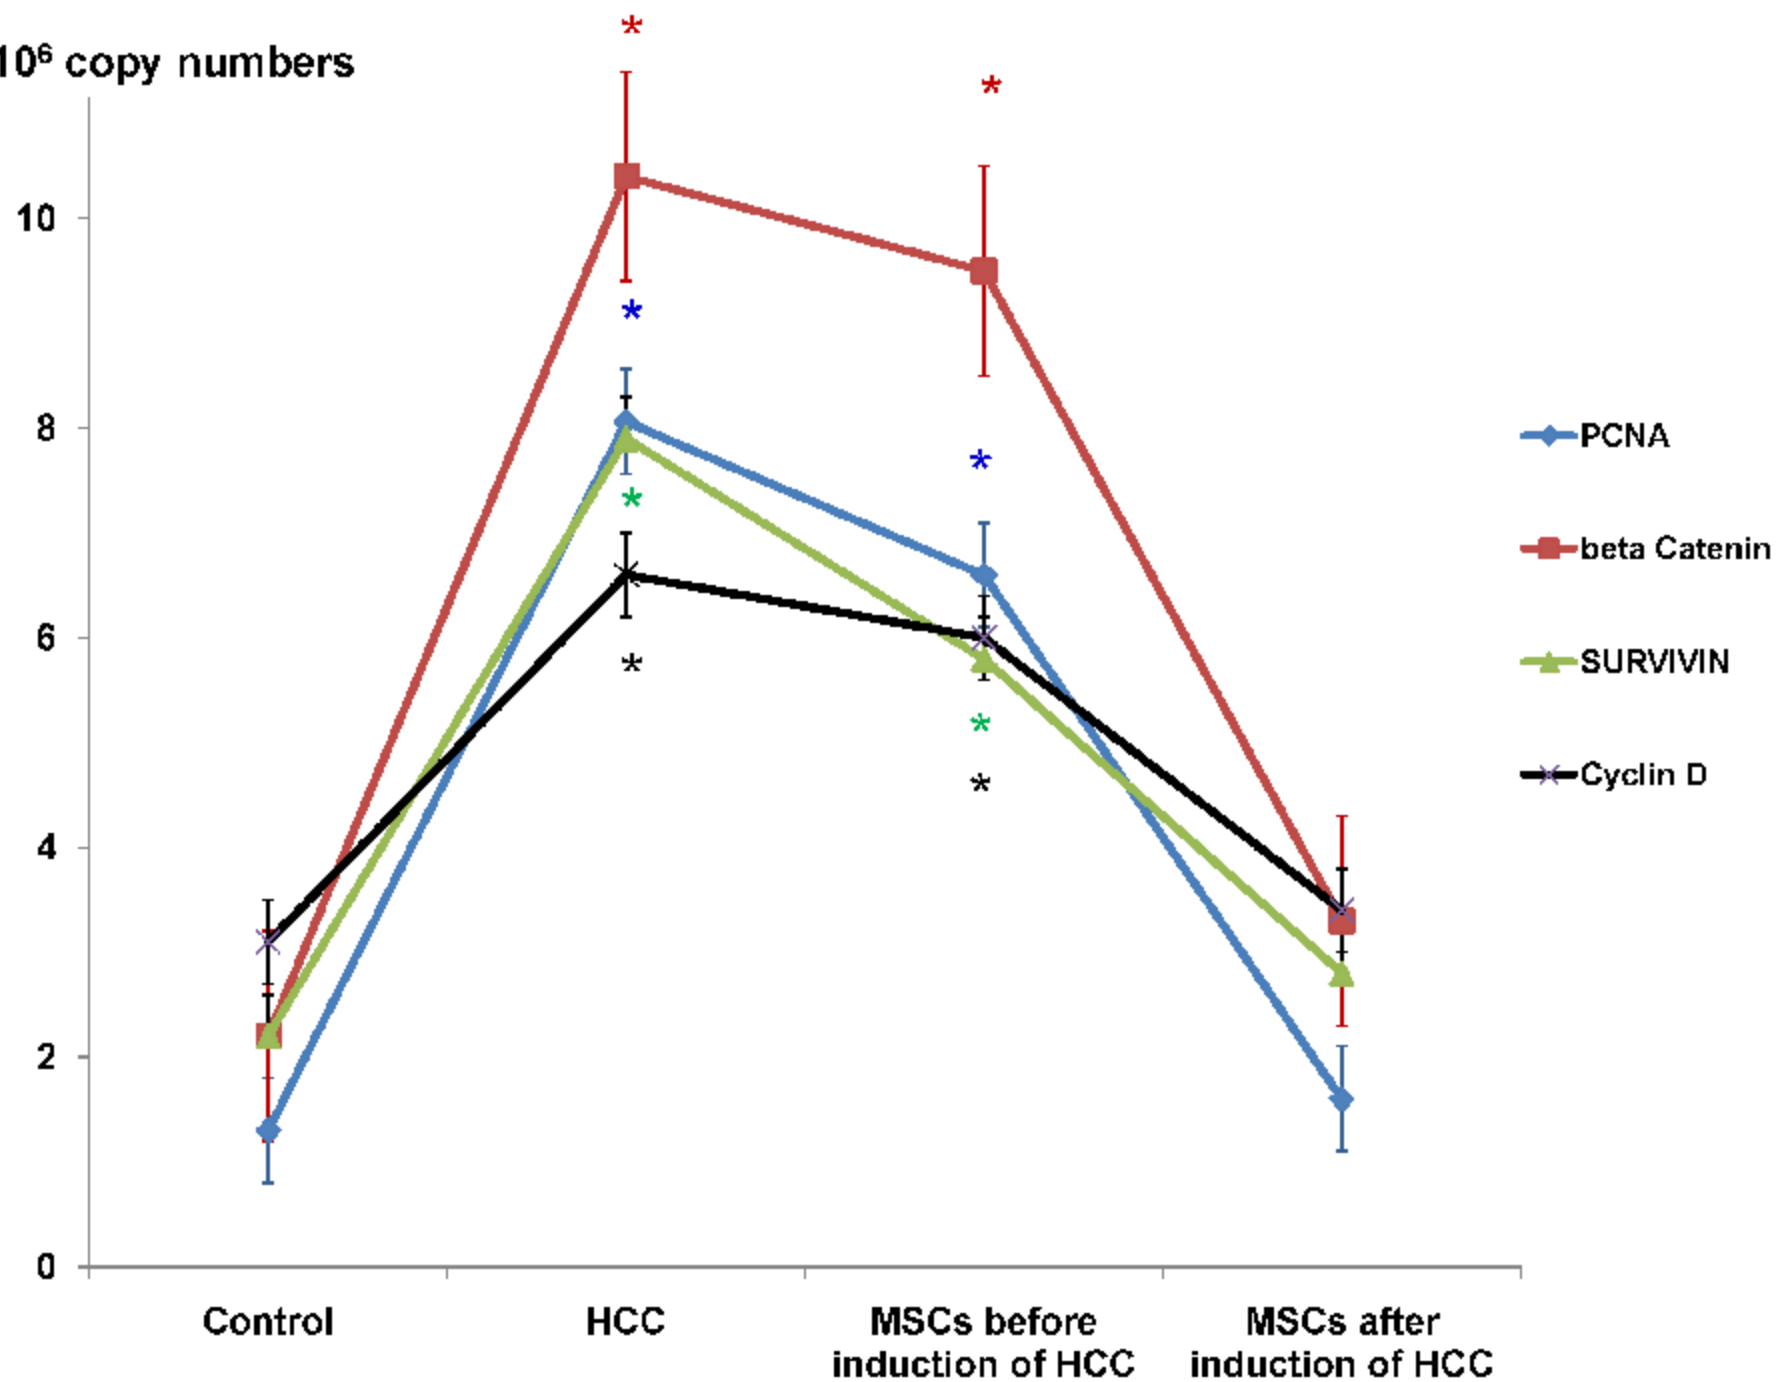

Supplement: MOESM9 [file 9662298]
